# Supplementary material for: Aqueous oxidation reaction enabled layer-by-layer corrosion of semiconductor nanoplates into single-crystalline 2D nanocrystals with single layer accuracy and ionic surface capping
Source: Royal Society of Chemistry journal article supplement (doi:10.1039/c5cc09732k), 2016-01-01
Supplement: c5cc09732k1.pdf [file c5cc09732k1.pdf]

# **Aqueous oxidation reaction enabled layer-by-layer corrosion of semiconductor nanoplates into single-crystalline 2D nanocrystals with single layer accuracy and ionic surface capping**

Muwei Ji <sup>a</sup>, Meng Xu<sup>a</sup>, Jun Zhang<sup>b</sup>, Jiajia Liu<sup>a</sup>, and Jiatao Zhang<sup>a,\*</sup>

a. Beijing Key Laboratory of Construction Tailorable Advanced Functional Materials and Green Applications, School of Materials Science and Engineering, Beijing Institute of Technology, Beijing, 100081, China

b. Institute of semiconductors, Chinese Academy of Sciences, Beijing, 100083, China

Corresponding Author

[zhangjt@bit.edu.cn](mailto:zhangjt@bit.edu.cn)

## **Present Addresses**

Beijing Institute of Technology, Beijing 100081, China. Tel.: +86 10 68918065; Fax: +86 10 68918065. E-mail: [zhangjt@bit.edu.cn](mailto:zhangjt@bit.edu.cn).

## Experiment

**Chemical and reagents:** All of reagents are analytical grade and employed without further purification. Ethylene glycol (EG) and Sodium hydroxide (NaOH) are purchased from Tianjin Guangfu Fine Chemical Research Institute. Polyvinylpyrrolidone (PVP, K30, MW: 30000) and Bismuth Chloride ( $\text{BiCl}_3$ ) are purchased from Sinopharm Chemical Reagent Co., Ltd., while potassium tellurite ( $\text{K}_2\text{TeO}_3$ ) is purchased from Aladdin Chemical Co., Ltd..

**Synthesis of  $\text{Bi}_2\text{Te}_3$  nanoplate:**  $\text{Bi}_2\text{Te}_3$  nanoplates is prepared by following the Zhao's reports with some modified<sup>1</sup>. In typically, PVP (K30, 4.44g) is dissolved in ethylene-glycol (EG, 40 mL) and then  $\text{K}_2\text{TeO}_3$  (1.2 mmol),  $\text{BiCl}_3$  (0.8 mmol) and NaOH (10 mmol) are placed under stirring in room temperature. After the chemicals dissolved, the resultant mixture is sealed in Teflon autoclave and heated to 180 °C, keeping at that temperature for 36 hours. The raw product is purified by washing with ethanol or methanol and centrifugation then re-dispersed in anhydrous methanol.

**Oxidation of  $\text{Bi}_2\text{Te}_3$  nanoplate:**  $\text{Bi}_2\text{Te}_3$  nanoplates (2 mL) is purified by washing with anhydrous methanol (2 mL) and centrifugation, and then re-dispersed in anhydrous methanol (4 mL). Then, ultrapure water (10 mL), NaOH aqueous solution (1 M, 0.1 mL) and  $\text{H}_2\text{O}_2$  (30%) are added and stirred for 3 hours at room temperature. Then the raw products are purified by washing with anhydrous methanol and centrifugation. And the oxidation using other oxidized reagent, such as  $\text{HNO}_3$  or  $\text{Fe}(\text{NO}_3)_3$ , is carried out in the  $\text{Bi}_2\text{Te}_3$  methanol solution. In typically, into  $\text{Bi}_2\text{Te}_3$  methanol solution,  $\text{HNO}_3$  (3%) or  $\text{Fe}(\text{NO}_3)_3$  (0.1 M, 1 mL) aqueous solution is added and the resultant mixture is purified by washing and centrifugation after stirring 3 hours.

**Characterizations:** The XRD pattern of samples are collected by using Bruker D8 multiply crystals X-ray diffractometer ( $10^\circ/\text{min}$ ). Low resolution transmission electron microscope (LRTEM) images are obtained by HITACHI H-7650 electron microscopy operating at 80 kV. High resolution TEM, element mapping and energy dispersive X-ray spectroscopy (EDS) are perform on FEI Tecnai G2 F20 S-Twin microscope working at 200 kV) equipped with X-ray energy-dispersive spectroscopy detector. Thirty microliters of the  $\text{Bi}_2\text{Te}_3$  colloid were drop-casted on freshly cleaved mica surface. After 10 min adsorption, excessive solutions are withdrawn from the mica surface followed by atomic force electron microscope (AFM) observations. Tapping-mode AFM studies were performed on a Dimension 3100 AFM (Bruker, USA) under ambient conditions. Commercial silicon tips with a nominal spring constant of 2.0 N/m and resonant frequency of 437.2 kHz were used in all the AFM imaging.

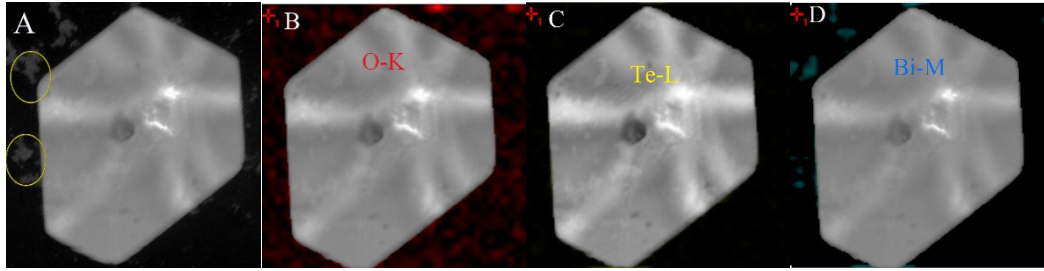

**Figure S1.** Element mapping of  $\text{Bi}_2\text{O}_3$  producing during the oxidation of  $\text{Bi}_2\text{Te}_3$  nanoplates. In order to make clear the composition of nanoparticles besides the  $\text{Bi}_2\text{Te}_3$  nanoplate, the  $\text{Bi}_2\text{Te}_3$  nanoplate mapping was deleted: (A) STEM image of  $\text{Bi}_2\text{O}_3$  nanocrystals (in the yellow line), (B) O mapping; (C) Te mapping which shows that nanocrystals contain none of Te element, confirming the nanocrystal is  $\text{Bi}_2\text{O}_3$ ; (D) Bi mapping. From B-D, the nanoparticles besides the nanosheet contain O and Bi element without Te element. It indicates that such nanoparticles are  $\text{Bi}_2\text{O}_3$  which is consistent to the XRD pattern of  $\text{Bi}_2\text{Te}_3$  after oxidation (Fig. 1 in maintext).

**Table S1.** Relative intensities comparison of XRD peaks of  $\text{Bi}_2\text{Te}_3$  nanoplate before and after oxidation by  $\text{H}_2\text{O}_2$ , comparing to intensity of peak (110).

| Facets   | Bulk | Volume of $\text{H}_2\text{O}_2$ / mL |      |      |      |    |
|----------|------|---------------------------------------|------|------|------|----|
|          |      | 0                                     | 0.3  | 0.6  | 0.9  | 3  |
| (0 0 6)  | 8    | 6.49                                  | 7.82 | 16.5 | 25   | 33 |
| (0 0 15) | 6    | 9.15                                  | 12.3 | 23   | 28.9 | 39 |
| (1 0 10) | 25   | 50.3                                  | 47   | 50   | 69   | 57 |

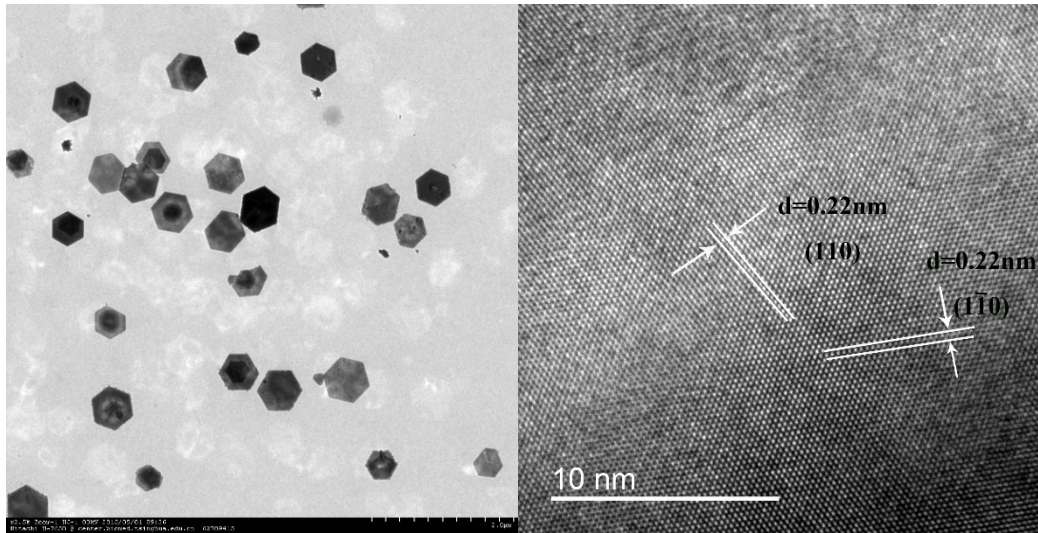

**Figure S2.** TEM image of  $\text{Bi}_2\text{Te}_3$  nanoplates with controllable oxidation degree, forming into stair-like nanocrystals (Left); HRTEM image (Right) of thinner part with indexed lattice spacing (0.22 nm) to facets (110) of  $\text{Bi}_2\text{Te}_3$ .

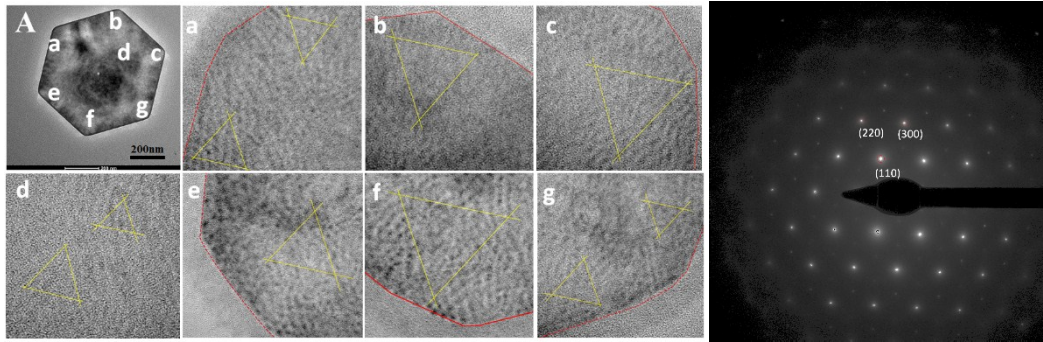

**Figure S3.** (A) HRTEM images of  $\text{Bi}_2\text{Te}_3$  nanoplate and its uniform lattice fringes with different department, (B) Electron diffraction of single  $\text{Bi}_2\text{Te}_3$  nanoplates.

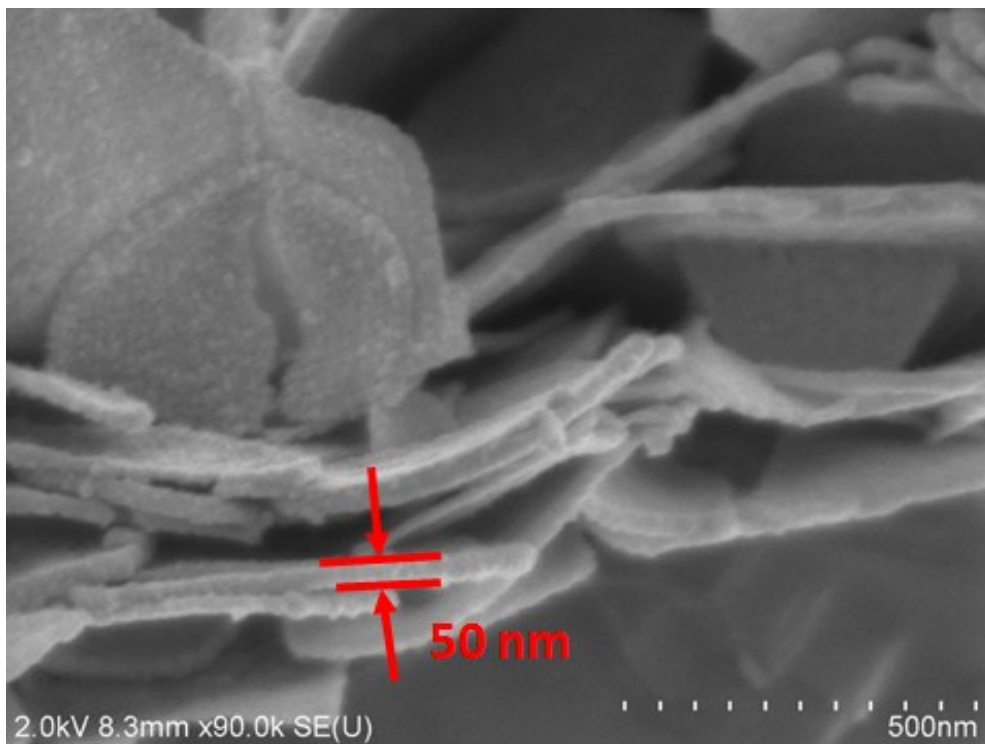

**Figure S4.** SEM image of as-prepared  $\text{Bi}_2\text{Te}_3$  nanoplates, which shows the thickness of  $\text{Bi}_2\text{Te}_3$  nanoplates is about 50 nm.

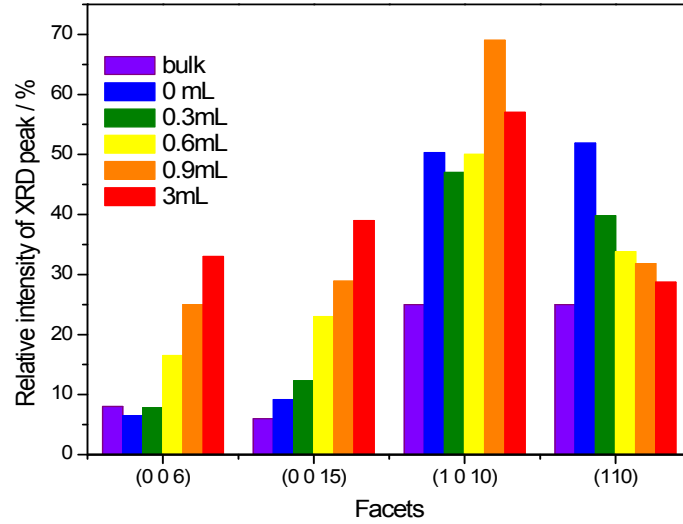

**Figure S5.** The relative intensities comparison of diffraction peaks (0 0 6), (0 0 15) and (1 0 10), comparing to (015) facets when using different concentrations of H<sub>2</sub>O<sub>2</sub>. The relative XRD peaks intensities of facets (0 0 6) and (0 0 15) are up to 33% and 39% from 7% and 12.3% in the case of nanoplates.

#### S-1: Raman spectra characterizations discussion:

In order to further confirm the pure phase of Bi<sub>2</sub>Te<sub>3</sub> nanoplate after oxidation, Raman spectra of different individual as-prepared nanoplates were collected (Fig. 4C and S6). The peaks located at 36.8, 61.9, 102 and 135 cm<sup>-1</sup> were assigned to the  $E_g^1$ ,  $A_{1g}^1$ ,  $E_g^2$ , and  $A_{1g}^2$  vibrational modes of Bi<sub>2</sub>Te<sub>3</sub> respectively (Table S2)<sup>2</sup>. All of peaks were caused by the vibration of Bi<sub>2</sub>Te<sub>3</sub> phase and no any other Raman peaks were observed, which illustrated that no Bi<sub>2</sub>O<sub>3</sub> or other oxide phase produced on the Bi<sub>2</sub>Te<sub>3</sub> nanoplate during oxidation. The Raman spectra of powder Bi<sub>2</sub>Te<sub>3</sub> nanosheets samples after oxidation were also collected. As shown in Figure S7, Raman peaks located at 102 cm<sup>-1</sup> and 135 cm<sup>-1</sup> should be assigned to  $E_g^2$ ,  $A_{1g}^2$  vibrational modes of Bi<sub>2</sub>Te<sub>3</sub> nanoplate respectively.<sup>2</sup> No Raman peaks of any bismuth oxide phase were observed. It also confirmed that no bismuth oxide existed on as-prepared ultrathin Bi<sub>2</sub>Te<sub>3</sub> nanosheets.

Table S2. Raman shifts and vibrational modes attribution.

| Raman shift / cm <sup>-1</sup> | Vibrational mode | Raman modes of Bi <sub>2</sub> Te <sub>3</sub> <sup>2</sup> |
|--------------------------------|------------------|-------------------------------------------------------------|
| 36.8                           | $E_g^1$          |                                                             |
| 61.9                           | $A_{1g}^1$       |                                                             |
| 102                            | $E_g^2$          |                                                             |
| 135                            | $A_{1g}^2$       |                                                             |

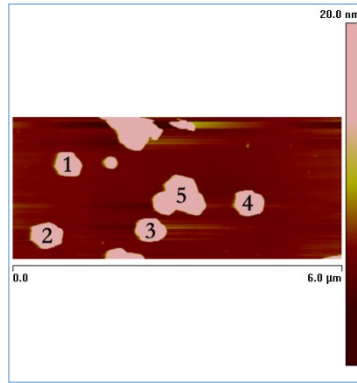

**Figure S6.** The AFM images of five different individual  $\text{Bi}_2\text{Te}_3$  nanosheets after chemical corrosion treatment. Then it is labeled for the individual Raman spectra detection.

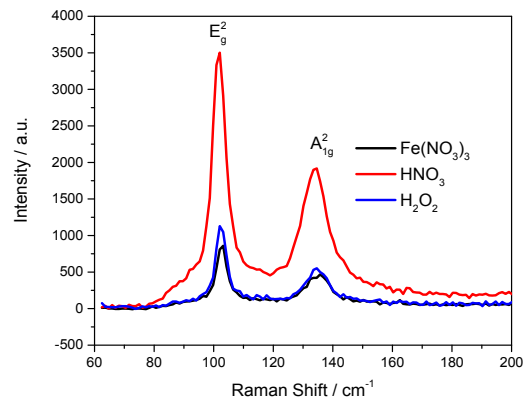

**Figure S7.** Raman shifts of as-prepared powder  $\text{Bi}_2\text{Te}_3$  nanosheets sample after oxidation.

**Reference:**

1. Zhang, Y.; Hu, L. P.; Zhu, T.; Xie, J.; Zhao, X. B. *Cryst. Growth Des.* **2013**, 13, 645.
2. Zhao, Y.; Luo, X.; Zhang, J.; Wu, J.; Bai, X.; Wang, M.; Jia, J.; Peng, H.; Liu, Z.; Quek, S. Y.; Xiong, Q. *Physical Review B* **2014**, 90, 245428.
